# Supplementary material
Source: PubMed Central journal article supplement (PMC4724172)
Supplement: supp_nov105_nov105supp_fig1.pdf [file supp_nov105_nov105supp_fig1.pdf]

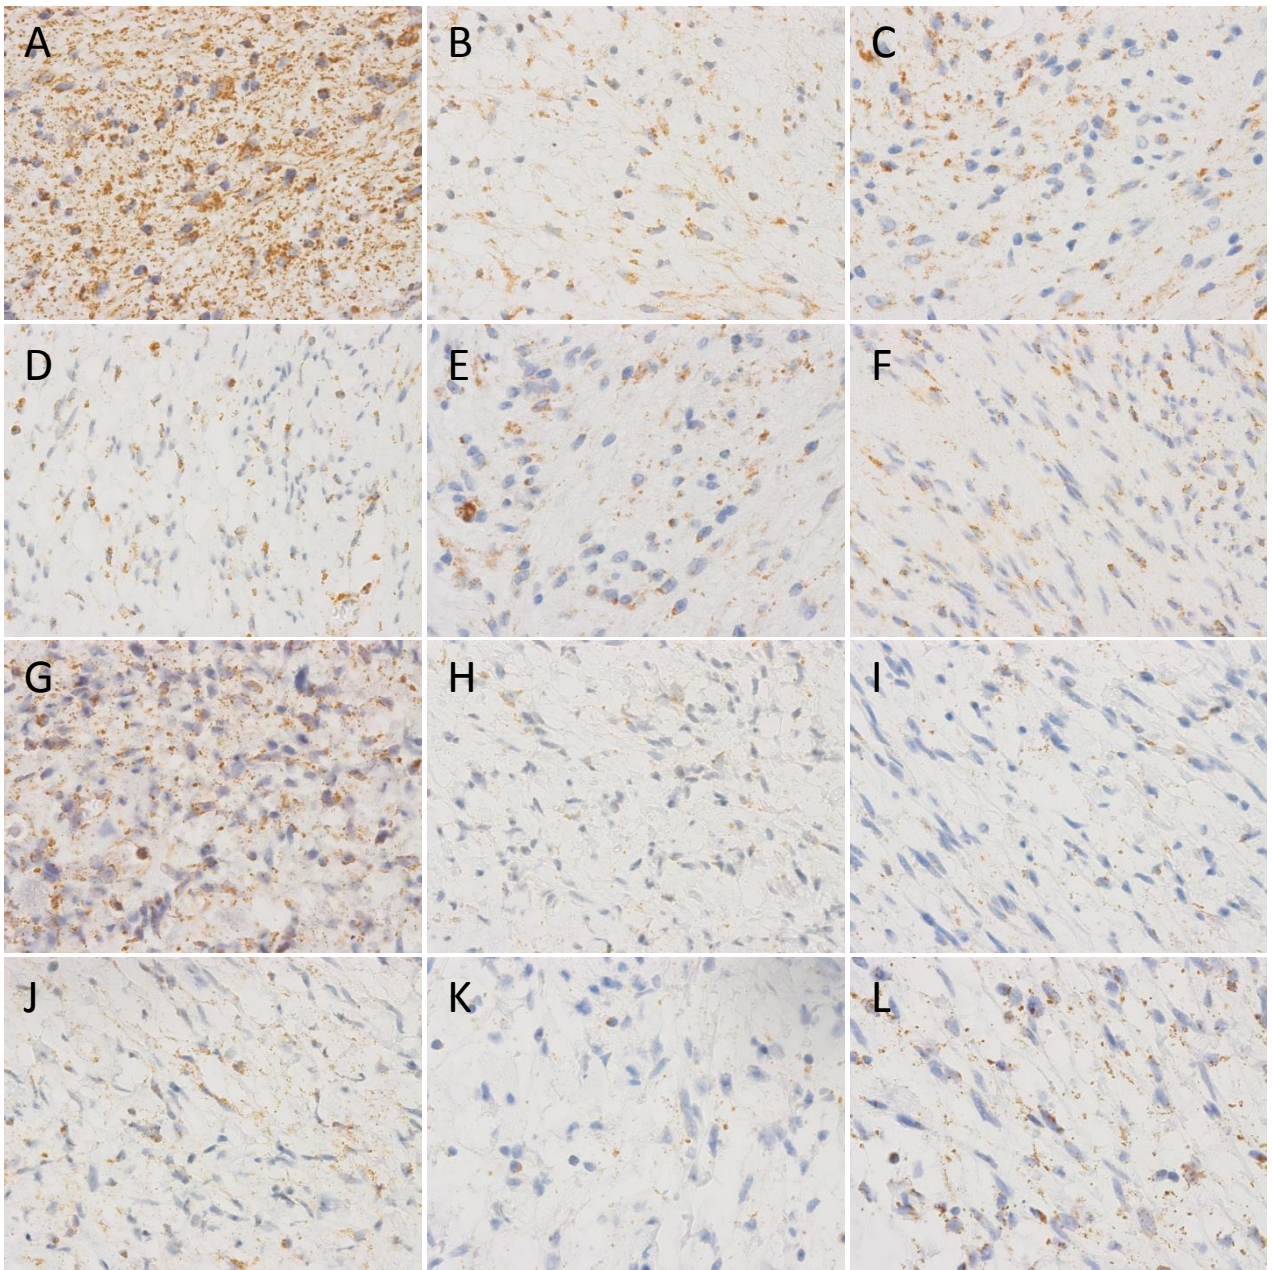

**Supplementary figure 1:** Expression of OXPHOS complexes in schwannomas and neurofibromas. **A, G:** porin; **B, H:** complex I; **C, I:** complex II; **D, J:** complex III; **E, K:** complex IV; **F, L:** complex V. **A-F:** Schwannoma (SW6). **G-L:** Neurofibroma (NF3); 63x magnification.
